# Supplementary material for: Drastic enhancement of carbon dioxide adsorption in fluoroalkyl-modified poly(allylamine)
Source: Royal Society of Chemistry journal article supplement (doi:10.1039/d1ta00879j), 2021-01-01
Supplement: d1ta00879j1.pdf [file d1ta00879j1.pdf]

## **Drastic enhancement of carbon dioxide adsorption in fluoroalkyl-modified poly(allylamine)**

*Athanasios Koutsianos,<sup>a,†</sup> Louise B. Hamdy,<sup>a</sup> Chun-Jae Yoo,<sup>b</sup> Jason J. Lee,<sup>b</sup> Marco Taddei,<sup>a,‡</sup> Jagoda M. Urban-Klaehn,<sup>c</sup> Jerzy Dryzek,<sup>d</sup> Christopher W. Jones,<sup>b</sup> Andrew R. Barron,<sup>a,e,f</sup> and Enrico Andreoli<sup>a,\*</sup>*

<sup>a</sup> *Energy Safety Research Institute, Swansea University, Bay Campus, Swansea, SA1 8EN, UK*

<sup>b</sup> *School of Chemical & Biomolecular Engineering, Georgia Institute of Technology, Atlanta, GA 30332, USA*

<sup>c</sup> *Energy and Environment S&T, Idaho National Laboratory, Idaho Falls, ID 83415, USA*

<sup>d</sup> *Institute of Nuclear Physics Polish Academy of Sciences, PL-31342 Krakow, Poland*

<sup>e</sup> *Department of Chemistry and Department of Materials Science and Nanoengineering, Rice University, Houston, TX 77005, USA*

<sup>f</sup> *Faculty of Engineering, Universiti Teknologi Brunei, Brunei Darussalam*

<sup>†</sup> *Current Address: Anorganische Chemie, Fakultät für Chemie und Chemische Biologie, Technische Universität Dortmund, Otto-Hahn-Straße 6, 44227 Dortmund, Germany*

<sup>‡</sup> *Current Address: Department of Chemistry and Industrial Chemistry, University of Pisa, Pisa 56124, Italy*

\* [e.andreoli@swansea.ac.uk](mailto:e.andreoli@swansea.ac.uk)

### **Contents**

- SEM-EDX: Figure S1 & Figure S2
- FTIR: Figure S3
- Gravimetric water uptakes: Figure S4
- CO<sub>2</sub> gravimetric uptakes: Figure S5
- CO<sub>2</sub> uptake plain PAA: Figure S6
- CO<sub>2</sub> uptakes under simulated flue gas conditions: Figure S7
- CO<sub>2</sub> adsorption-desorption TGA profiles: Figure S8
- In-situ FTIR: Figure S9
- CHN elemental analyses: Table S1
- Literature on DAC sorbents performance: Table S2
- PALS: Figure S10 & Table S3
- References

**SEM-EDX**

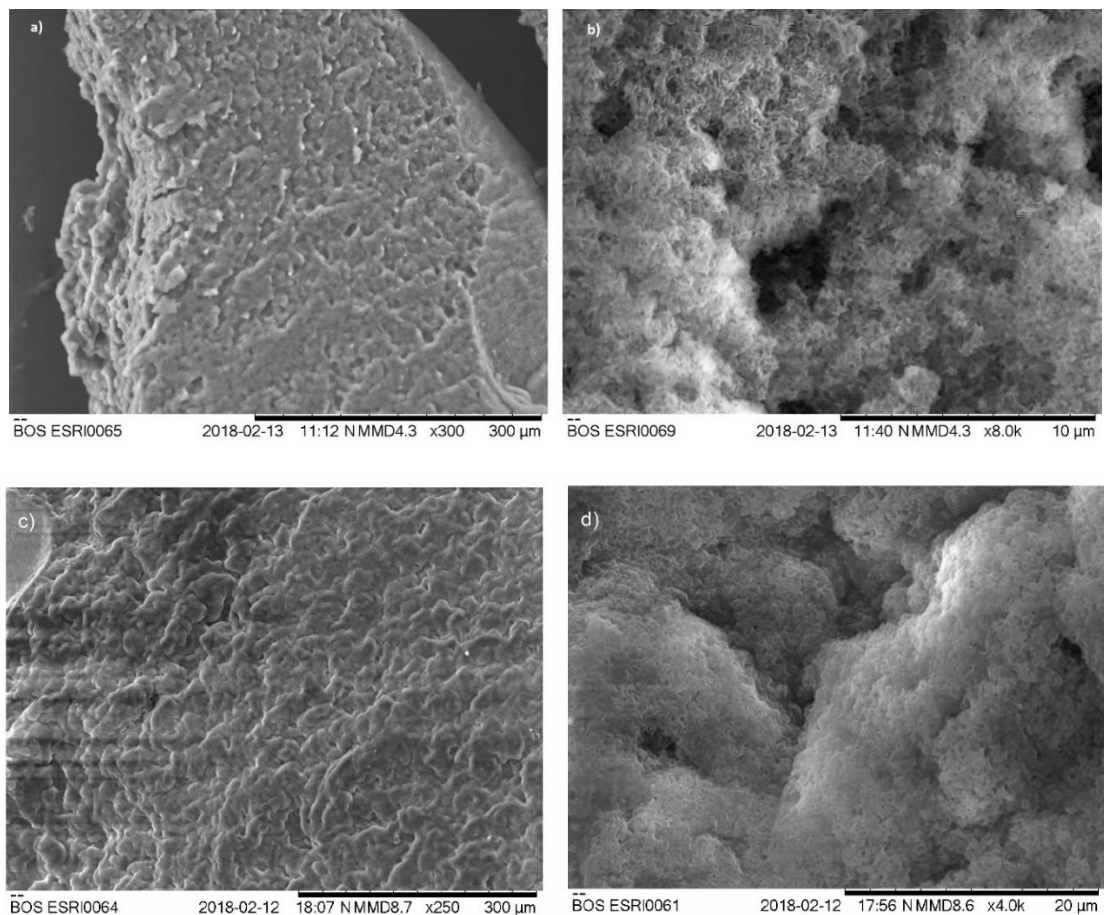

**Figure S1.** SEM micrographs of PAA-C<sub>60</sub> (a and b) and F2-PAA-C<sub>60</sub> (c and d). Scale bar is a) 300 μm b) 10 μm c) 300 μm and d) 20 μm.

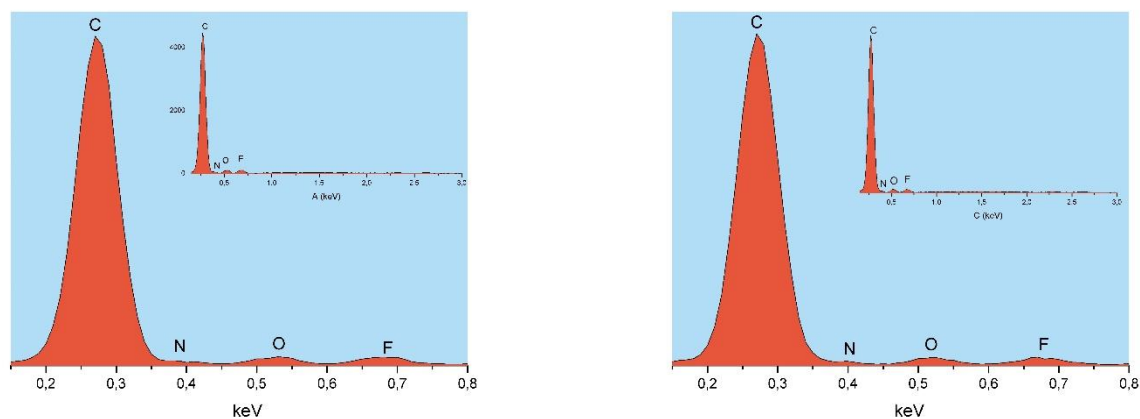

**Figure S2.** Energy dispersive X-ray spectra of F1-PAA-C<sub>60</sub> at two different points. Inset image shows broader range of the same spectrum

**FTIR**

The IR spectra of the vacuum conditioned PAA-C<sub>60</sub> and F1-PAA-C<sub>60</sub> differ only in the peak present at 1165 cm<sup>-1</sup> in the F1-PAA-C<sub>60</sub> spectrum assigned to the C-O stretching of alcohols. In Figure S3, the spectral features of the vacuum evacuated PAA-C<sub>60</sub> are assigned to their respective vibrational modes. Starting from the left: the broad absorption peak above 3000 cm<sup>-1</sup> is associated to the amine N-H stretching,<sup>1</sup> the two sharper peaks coming right after at 3000-2500 cm<sup>-1</sup> are due to the methylene bridge C-H stretching,<sup>2,3</sup> the doublet centred at 1600 cm<sup>-1</sup> to N-H deformation,<sup>1,4</sup> the single peak at 1450 cm<sup>-1</sup> to the C-H scissoring,<sup>1</sup> and the last three doublets to C-H wagging, C-N stretching, and N-H bending at 1300, 1100, and 900 cm<sup>-1</sup>, respectively.<sup>1-3</sup>

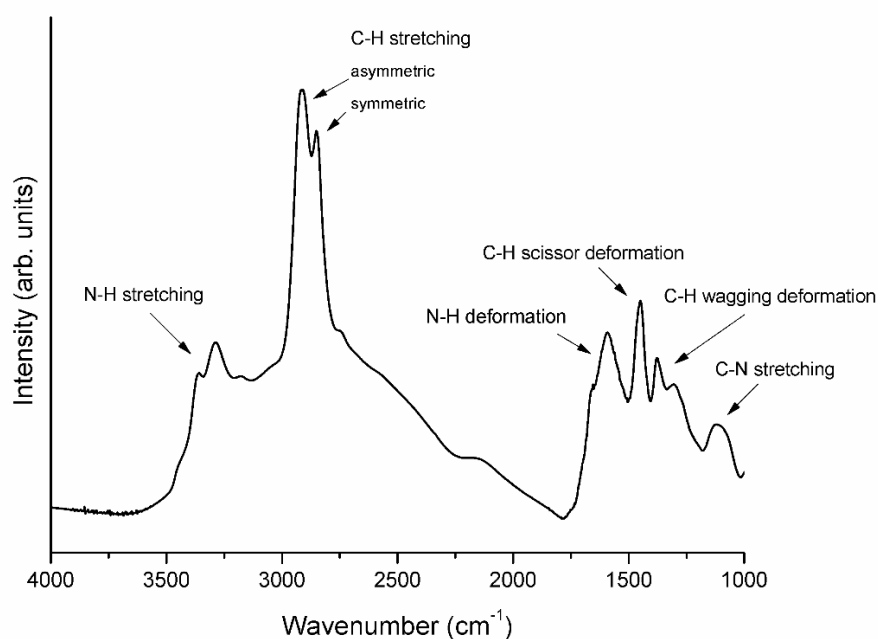

**Figure S3.** Peak assignments of the FTIR spectrum of PAA-C<sub>60</sub>

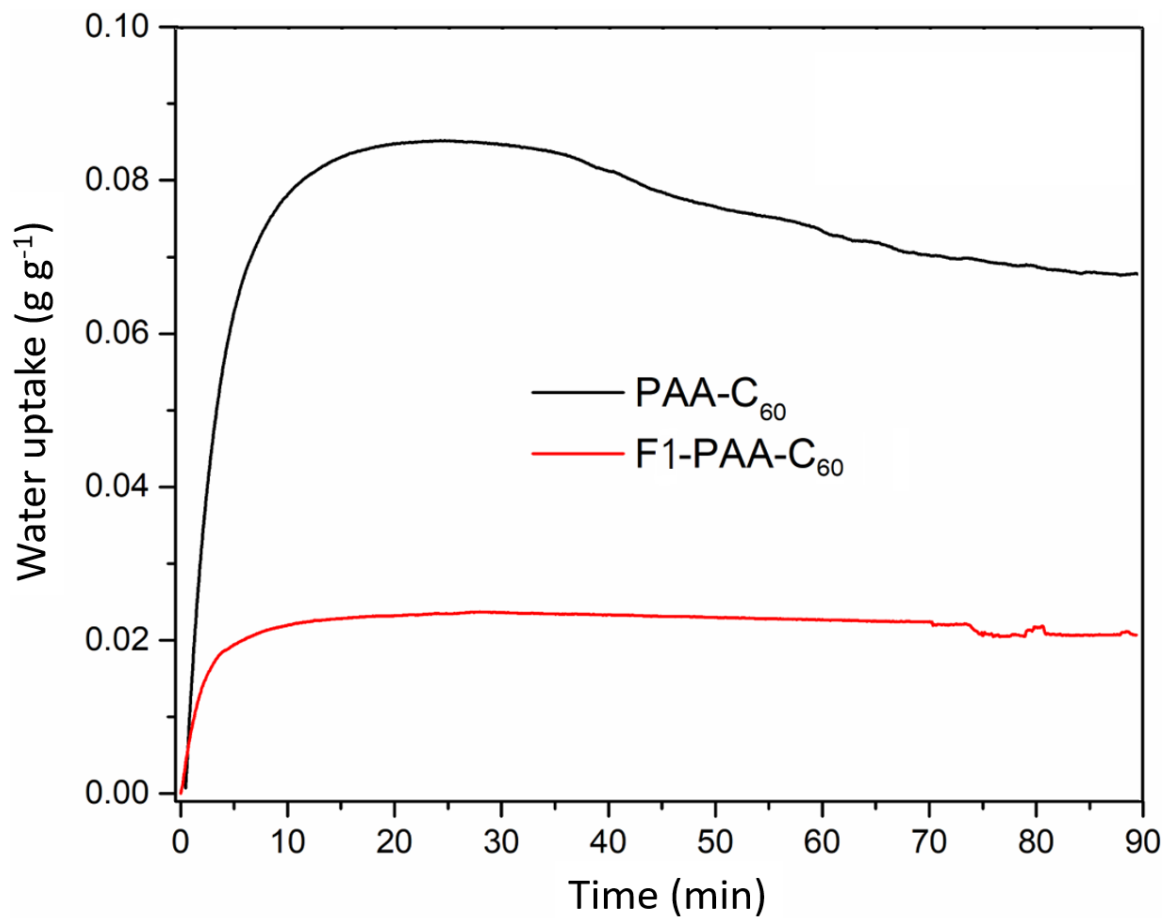

**Figure S4.** Gravimetric water uptake of PAA-C<sub>60</sub> and F1-PAA-C<sub>60</sub>

CO<sub>2</sub> gravimetric uptakes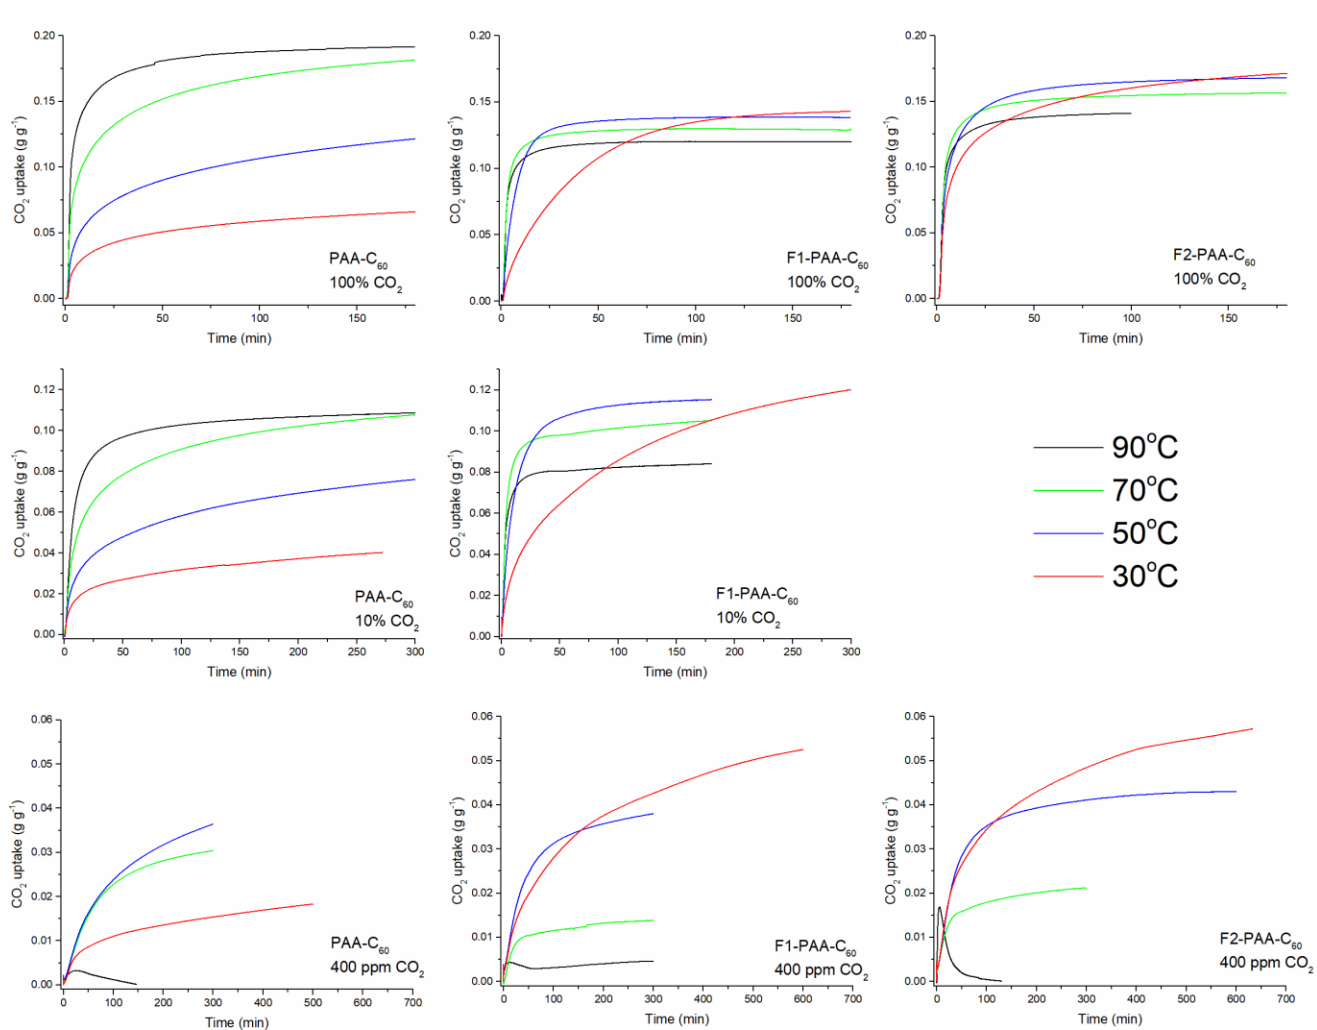

**Figure S5.** Gravimetric CO<sub>2</sub> uptake curves for PAA-C<sub>60</sub>, F1-PAA-C<sub>60</sub>, and F2-PAA-C<sub>60</sub> in pure CO<sub>2</sub>, 10% CO<sub>2</sub>, and 400 ppm CO<sub>2</sub> at 30, 50, 70 and 90 °C, except for F2-PAA-C<sub>60</sub> at 10% CO<sub>2</sub> which was not tested.

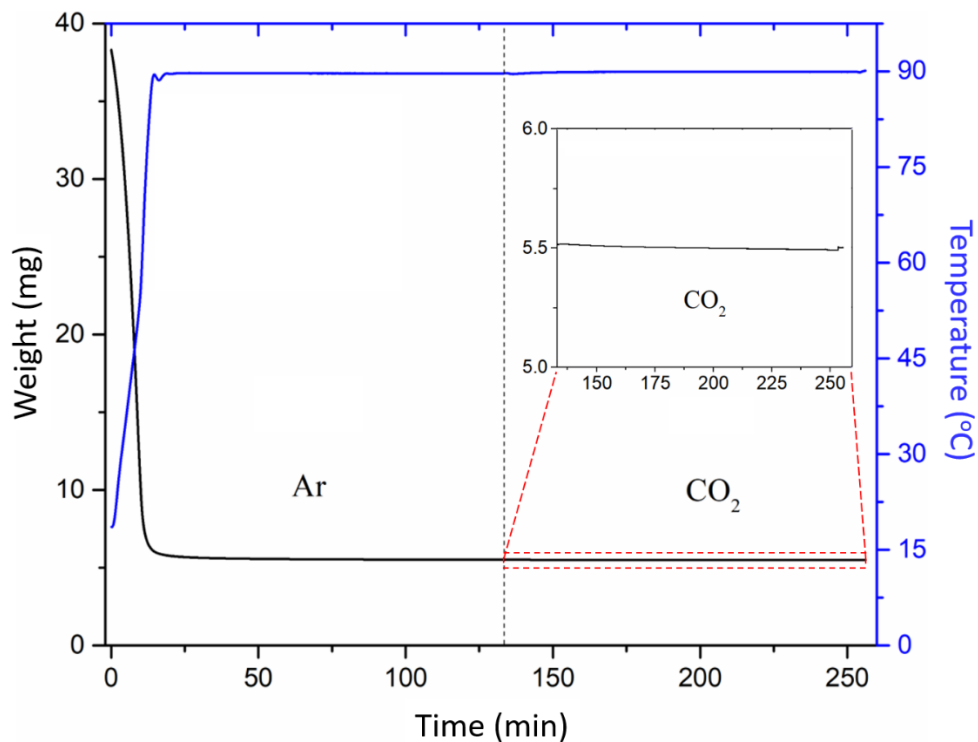

**Figure S6.** CO<sub>2</sub> uptake of plain PAA. A methanolic solution of PAA was initially conditioned at 90 °C under Ar atmosphere until constant weight to achieve the complete evaporation of methanol solvent. The resulting PAA sample was subsequently exposed to CO<sub>2</sub> to study its CO<sub>2</sub> uptake gravimetrically (inset).

**Equilibrium CO<sub>2</sub> uptakes under simulated flue gas conditions**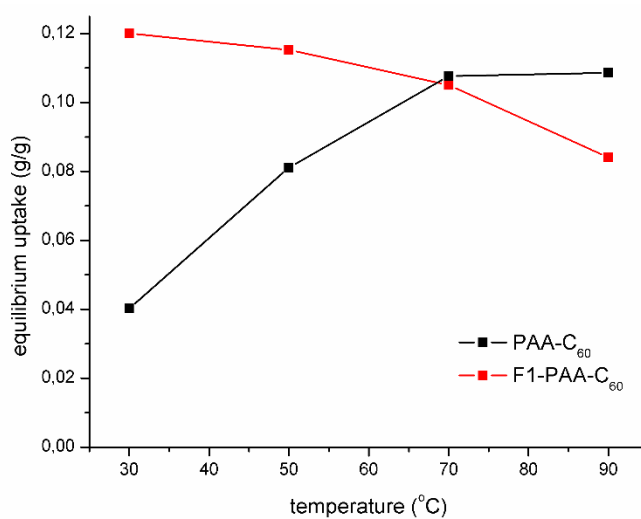

**Figure S7.** CO<sub>2</sub> uptake vs temperature for PAA-C<sub>60</sub> (black), F1-PAA-C<sub>60</sub> (red) under 10% CO<sub>2</sub> (the gravimetric curves corresponding to each data point are provided in Figure S4).

## Adsorption-desorption cycles

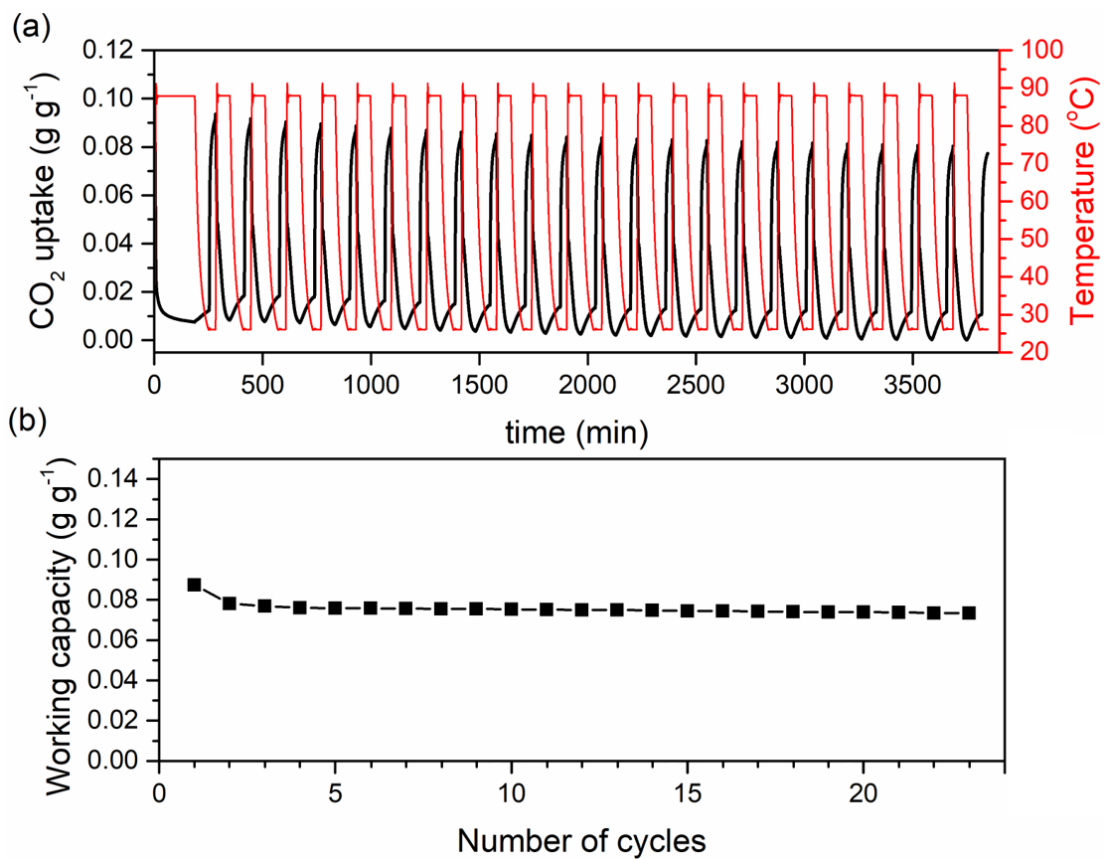

**Figure S8.** a) CO<sub>2</sub> adsorption–desorption profiles of F-PAA-C<sub>60</sub> (adsorption: 100% CO<sub>2</sub> at 25 °C; desorption 100% Ar at 90 °C). b) CO<sub>2</sub> working capacities of the sorbent plotted over the number of adsorption-desorption cycles.



## In-situ FTIR

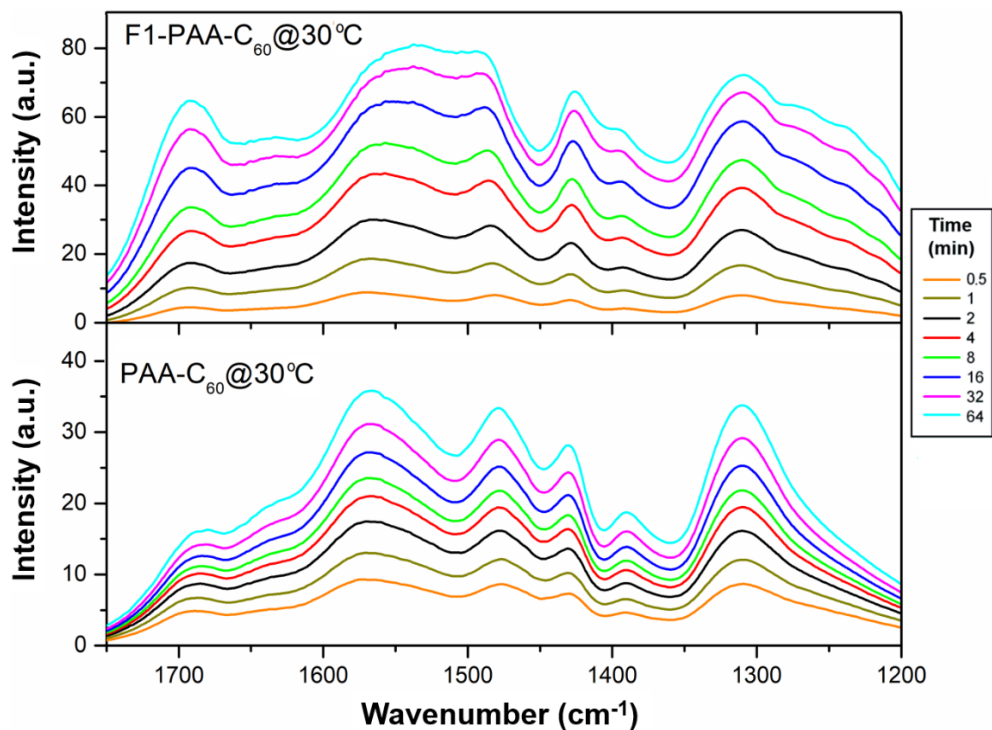

**Figure S9.** FTIR spectra for CO<sub>2</sub> sorption by PAA-C<sub>60</sub> and F<sub>1</sub>PAA-C<sub>60</sub> at 30 °C over 1h.

## CHN elemental analyses

**Table S1.** Results from the elemental analysis of PAA-C<sub>60</sub>, F<sub>1</sub>-PAA-C<sub>60</sub> and F<sub>2</sub>-PAA-C<sub>60</sub> conditioned at 110 °C under vacuum.

| Sample                              | N (wt%) | N (mol) | C (wt%) | C (mol) | H (wt%) | H (mol) |
|-------------------------------------|---------|---------|---------|---------|---------|---------|
| PAA-C <sub>60</sub>                 | 17.70   | 1.26    | 62.78   | 5.23    | 9.74    | 9.66    |
| F <sub>1</sub> -PAA-C <sub>60</sub> | 13.52   | 0.96    | 55.29   | 3.95    | 8.55    | 8.48    |
| F <sub>2</sub> -PAA-C <sub>60</sub> | 13.62   | 0.97    | 57.74   | 4.81    | 7.96    | 7.90    |

The weights obtained from elemental analysis are converted into moles from which the molar ratios were calculated as follows (MW = molecular weight; AW = atomic weight)

*PAA-C<sub>60</sub>*

PAA = (allylamine)<sub>x</sub> = (AA)<sub>x</sub> = (C<sub>3</sub>H<sub>7</sub>N)<sub>x</sub>

PAA-C<sub>60</sub> = (C<sub>3</sub>H<sub>7</sub>N)<sub>X</sub> (C<sub>60</sub>)<sub>Y</sub> (H<sub>2</sub>O)<sub>Z</sub>, even after conditioning the sample at 110 °C under vacuum, there is some moisture in the materials as they are extremely hydrophilic and they exposed to the environment for some time before being inserted in the CHN analyzer.

$$C_{5.23} H_{9.66} N_{1.26} = (C_3H_7N)_X (C_{60})_Y (H_2O)_Z = C_{3X+60Y} H_{7X+2Z} N_X$$

$$3X+60Y = 5.23; 7X+2Z = 9.66; X = 1.26 \rightarrow Y = 0.024, Z = 0.42$$

$$MW(C_3H_7N) = 57.09 \text{ g/mol} \rightarrow PAA = MW(C_3H_7N) * 1.23 = 71.93 \text{ g}$$

$$MW(C_{60}) = 720.66 \text{ g/mol} \rightarrow C_{60} = MW(C_{60}) * 0.024 = 17.30 \text{ g}$$

$$MW(H_2O) = 18.02 \text{ g/mol} \rightarrow H_2O = MW(H_2O) * 0.42 = 7.57 \text{ g}$$

PAA:C<sub>60</sub> dry weight ratio 80.6/19.4

$$PAA-C_{60} \text{ dry} = (AA)_{1.26} (C_{60})_{0.024} = (AA)_1 (C_{60})_{0.019}$$

### F-PAA-C<sub>60</sub>

$$PAA = (\text{allylamine})_x = (C_3H_7N)_X$$

$$\text{Glycidyl 2,2,3,3,4,4,5,5-octafluoropentyl ether (GOF)} = C_8H_8F_8O_2$$

$$F2-PAA-C_{60} = (C_3H_7N)_X (C_{60})_Y (C_8H_8F_8O_2)_Z (H_2O)_E = C_{3X+60Y+8Z} H_{7X+8Z+2E} N_X O_{2Z+E} F_{8Z}$$

$$3X+60Y+8Z = 4.81 ; X = 0.97 ; 7X+8Z+2E = 7.90$$

We also use the mass balance for the sample: C+H+N+F+O = 100 → F+O = 100-C-H-N = 100-57.74-13.62-7.96 = 20.68 → (2Z+E)\*AW(O)+8Z\*AW(F) = (2Z+E)\*15.999+8Z\*18.998 = 20.68 → 183.982Z + 15.999E = 20.68 (eq.1)

Replacing X = 0.97 in the hydrogen balance, 7X+8Z+2E = 7.90, we get 8Z+2E=1.11 (eq. 2). Based on equations 1 and 2, we calculate Z=0.098 and E=0.16.

Using the mass balance of carbon, 3X+60Y+8Z = 4.81, we calculate Y= 0.019.

So F2-PAA-C<sub>60</sub>=(C<sub>3</sub>H<sub>7</sub>N)<sub>0.97</sub> (C<sub>60</sub>)<sub>0.019</sub> (C<sub>8</sub>H<sub>8</sub>F<sub>8</sub>O<sub>2</sub>)<sub>0.098</sub> (H<sub>2</sub>O)<sub>0.16</sub> or for the dry material:

$$F2-PAA-C_{60} \text{ dry} = (AA)_1 (C_{60})_{0.020} (F)_{0.101}$$

Similarly, we calculate the composition of F1-PAA-C<sub>60</sub> = (C<sub>3</sub>H<sub>7</sub>N)<sub>0.97</sub> (C<sub>60</sub>)<sub>0.019</sub> (C<sub>8</sub>H<sub>8</sub>F<sub>8</sub>O<sub>2</sub>)<sub>0.073</sub> (H<sub>2</sub>O)<sub>0.57</sub> or for the dry material:

$$F1-PAA-C_{60} \text{ dry} = (AA)_1 (C_{60})_{0.020} (F)_{0.075}$$

**Literature on DAC sorbents performance**

**Table S2.** Polyamine-based direct air capture CO<sub>2</sub> adsorbents (from 2011 – 2020). PEI: Poly(ethylenimine) ; PAA: Poly(allylamine) ; PPG: poly(propylene guanidine) ; TEPA: Tetraethylenepentamine ; TPTA: Tripropylene-tetramine ; TREN: Tris (2-amino ethyl)amine ; PEHA: Pentaethylenehexamine ; APTES: 3-(aminopropyl)triethoxysilane ; AEAPDMS-NFC: N-(2-aminoethyl)-3-aminopropylmethyldimethoxysilane nanofibrilated cellulose.

| <b>Adsorbent</b>       | <b>Amine</b>                     | <b>amine wt%<br/>[mmol N g<sup>-1</sup>]</b> | <b>Temp<br/>.[°C]</b> | <b>CO<sub>2</sub> conc.<br/>[% RH]</b> | <b>Pressure</b> | <b>CO<sub>2</sub><br/>capacity<br/>[mmol g<sup>-1</sup>]</b> | <b>Amine Eff.<br/>[mol CO<sub>2</sub><br/>permol of<br/>amine]</b> | <b>Ref.</b>                                                                                                  |
|------------------------|----------------------------------|----------------------------------------------|-----------------------|----------------------------------------|-----------------|--------------------------------------------------------------|--------------------------------------------------------------------|--------------------------------------------------------------------------------------------------------------|
| PAA-C <sub>60</sub>    | PAA (M <sub>w</sub> 120 – 180 K) | 80.5 wt%<br>(14.10)                          | 30                    | 400 ppm                                | 1 atm           | 0.43                                                         | 0.03                                                               | This paper                                                                                                   |
| F1-PAA-C <sub>60</sub> | PAA (M <sub>w</sub> 120 – 180 K) | 61.3 wt%<br>(10.74)                          | 30                    | 400 ppm                                | 1 atm           | 1.20                                                         | 0.11                                                               | This paper                                                                                                   |
| F2-PAA-C <sub>60</sub> | PAA (M <sub>w</sub> 120 – 180 K) | 57.0 wt%<br>(9.98)                           | 30                    | 400 ppm                                | 1 atm           | 1.30                                                         | 0.13                                                               | This paper                                                                                                   |
| 48% PEI/SBA-15         | PEI (M <sub>w</sub> 1800)        | 48 wt%<br>(11.14)                            | 30                    | 400 ppm                                | 1 atm           | 1.10                                                         | 0.10                                                               | Silica supported poly(propylene guanidine) as a CO <sub>2</sub> Sorbent in simulated flue gas and direct air |

## Electronic Supplementary Information

|                                         |                          |                                     |    |                  |       |      |      |                                                                                                                                                                                                        |
|-----------------------------------------|--------------------------|-------------------------------------|----|------------------|-------|------|------|--------------------------------------------------------------------------------------------------------------------------------------------------------------------------------------------------------|
|                                         |                          |                                     |    |                  |       |      |      | capture Sang Jae Park, Adsorption, 2020                                                                                                                                                                |
| 50% PPG/SBA-15                          | PPG                      | 50 wt%                              | 30 | 400 ppm          | 1 atm | 0.63 | 0.04 | As above                                                                                                                                                                                               |
| EtSNTs-50 PEI encapsulated in nanotubes | PEI (M <sub>w</sub> 600) | (11.2 )                             | 30 | 400 ppm          | 1 atm | 1.05 | 0.09 | Aminopolymer Confined in Ethane-Silica Nanotubes for CO <sub>2</sub> Capture from Ambient Air, Lina Liu, ChemNanoMat, 2020                                                                             |
| PEI_H-SiO <sub>2</sub>                  | PEI (M <sub>w</sub> 800) | 2.62 g PEI/g sorbent<br>(16.72 )    | 30 | 400 ppm (19% RH) | 1 atm | 3.36 | 0.20 | Aminopolymer-Impregnated Hierarchical Silica Structures: Unexpected Equivalent CO <sub>2</sub> Uptake under Simulated Air Capture and Flue Gas Capture Conditions Hyuk Taek Kwon et al, ChemMater 2019 |
| PEI_H-SiO <sub>2</sub>                  | PEI (M <sub>w</sub> 800) | 2.62 g PEI/g sorbent<br>(16.72 )    | 30 | 400 ppm          | 1 atm | 2.34 | 0.14 | As above                                                                                                                                                                                               |
| PEHA-PO-1-2/50S                         | PEHA                     | 59.5 wt% organic<br>(10.24 mmolN/g) | 25 | 400 ppm          | 1 atm | 1.25 | 0.12 | Oxidation-Resistant Cost-Effective Epoxide-Modified Polyamine Adsorbents for CO <sub>2</sub> Capture from Various Sources Including Air 2019                                                           |
| TEPA-PO-1-2/50S                         | TEPA                     | 61.0 wt% organic                    | 25 | 400 ppm          | 1 atm | 1.34 | 0.13 | As above                                                                                                                                                                                               |

## Electronic Supplementary Information

|                              |                             |                                               |    |         |       |      |      |                                                                                                                                                                                                                                                |
|------------------------------|-----------------------------|-----------------------------------------------|----|---------|-------|------|------|------------------------------------------------------------------------------------------------------------------------------------------------------------------------------------------------------------------------------------------------|
|                              |                             | (9.99 )                                       |    |         |       |      |      |                                                                                                                                                                                                                                                |
| PEI-CA-SiO <sub>2</sub>      | PEI (M <sub>w</sub> 800 Da) | 0.7 g<br>PEI/gSiO <sub>2</sub><br><br>(9.52 ) | 35 | 380 ppm | 1 atm | 0.36 | 0.04 | Direct CO <sub>2</sub> Capture from Air using Poly(ethylenimine)-Loaded Polymer/Silica Fiber Sorbents 2019                                                                                                                                     |
| 40%<br>TPTA/SBA-15           | TPTA                        | 41 wt%<br>organic<br><br>(8.71 )              | 35 | 400 ppm | 1 atm | 1.86 | 0.21 | Design of Aminopolymer Structure to Enhance Performance and Stability of CO <sub>2</sub> Sorbents: Poly(propylenimine) vs Poly(ethylenimine) Simon H. Pang, JACS, 2017                                                                         |
| SBA-15/PEI/PEG200            | PEI (M <sub>w</sub> 800)    | (8.38 )                                       | 30 | 400 ppm | 1 atm | 1.64 | 0.20 | Role of Additives in Composite PEI/Oxide CO <sub>2</sub> Adsorbents: Enhancement in the Amine Efficiency of Supported PEI by PEG in CO <sub>2</sub> Capture from Simulated Ambient Air Miles A. Sakwa-Novak, ACS Appl. Mater. Interfaces, 2015 |
| Templated Alumina/PEI/PEG200 | PEI (M <sub>w</sub> 800)    | (5.98 )                                       | 30 | 400 ppm | 1 atm | 1.29 | 0.22 | As above                                                                                                                                                                                                                                       |

## Electronic Supplementary Information

|                     |                     |                           |    |                           |            |             |      |                                                                                                                                                                                                                            |
|---------------------|---------------------|---------------------------|----|---------------------------|------------|-------------|------|----------------------------------------------------------------------------------------------------------------------------------------------------------------------------------------------------------------------------|
| PEI/PIM-1 composite | PEI ( $M_w$ 800)    | 21 wt %<br>(4.88 )        | 35 | 100%                      | 0.0004 bar | 0.23        | 0.05 | PIM-1 as a Solution-Processable “Molecular Basket” for CO <sub>2</sub> Capture from Dilute Sources<br>Simon H. Pang, ACS Macro Letters, 2015                                                                               |
| HP20/PEI-50         | PEI                 | 50 wt %<br>(11.61 mmol/g) | 25 | 400 ppm                   | 1 atm      | 2.26        | 0.19 | Polyethylenimine-Impregnated Resin for High CO <sub>2</sub> Adsorption: An Efficient Adsorbent for CO <sub>2</sub> Capture from Simulated Flue Gas and Ambient Air<br>Zhenhe Chen,† Applied Materials and Interfaces, 2013 |
| FS-PEI-50           | PEI ( $M_w$ 25,000) | 50 wt %<br>(11.61 )       | 25 | 410 – 420 ppm             | 10.3 bar   | 1.65 – 1.71 | 0.15 | Carbon Dioxide Capture from the Air Using a Polyamine Based Regenerable Solid Adsorbent<br>Alain Goeppert, JACS 2011                                                                                                       |
| FS-PEI-50           | PEI ( $M_w$ 25,000) | 50 wt %<br>(11.61 )       | 25 | 410 – 420 ppm<br>(RH 67%) | 10.3 bar   | 1.41        | 0.12 | As above                                                                                                                                                                                                                   |
| FS-PEI-33           | PEI ( $M_w$ 25,000) | 33 wt %<br>(7.66 )        | 25 | 410 – 420 ppm<br>(RH 67%) | 10.3 bar   | 1.74        | 0.23 | As above                                                                                                                                                                                                                   |

## Electronic Supplementary Information

|                |                                    |          |    |                     |       |      |      |                                                                                                                                                                                                |
|----------------|------------------------------------|----------|----|---------------------|-------|------|------|------------------------------------------------------------------------------------------------------------------------------------------------------------------------------------------------|
| AEAPDMS-NFC-FD | AEAPDMS-NFC                        | (4.9 )   | 25 | 506 ppm<br>(40% RH) | 1 atm | 1.39 | 0.28 | Amine-Based Nanofibrillated Cellulose As Adsorbent for CO <sub>2</sub> Capture from Air. Gebald, C. Environ. Sci. Technol. 2011                                                                |
| SynA50         | PEI (M <sub>w</sub> 800)           | (11.20 ) | 25 | 400 ppm             | 1 atm | 1.74 | 0.16 | Mesoporous Alumina-Supported Amines as Potential Steam-Stable Adsorbents for Capturing CO <sub>2</sub> from Simulated Flue Gas and Ambient Air. Watcharop Chaikittisilp, Energy and Fuels 2011 |
| SynA40         | PEI (M <sub>w</sub> 800)           | (8.66 )  | 25 | 400 ppm             | 1 atm | 1.33 | 0.15 | As above                                                                                                                                                                                       |
| MS40           | PEI (M <sub>w</sub> 800)           | (9.23 )  | 25 | 400 ppm             | 1 atm | 1.05 | 0.11 | As above                                                                                                                                                                                       |
| PEI/Silica     | PEI (M <sub>w</sub> 800)           | (10.5 )  | 25 | 400 ppm             | 1 atm | 2.36 | 0.22 | Amine-Tethered Solid Adsorbents Coupling High Adsorption Capacity and Regenerability for CO <sub>2</sub> Capture From Ambient Air, Choi et al. 2011                                            |
| A-PEI/Silica   | PEI (M <sub>w</sub> 800),<br>APTES | (10.7 )  | 25 | 400 ppm             | 1 atm | 2.26 | 0.21 | As above                                                                                                                                                                                       |

## Electronic Supplementary Information

|                |                                                   |         |    |         |       |      |      |                                                                                                                                                                      |
|----------------|---------------------------------------------------|---------|----|---------|-------|------|------|----------------------------------------------------------------------------------------------------------------------------------------------------------------------|
| T-PEI/Silica   | PEI ( $M_w$ 800),<br>tetrapropyl<br>orthotitanate | (10.5 ) | 25 | 400 ppm | 1 atm | 2.19 | 0.21 | As above                                                                                                                                                             |
| PAA_MCM_4<br>1 | PAA ( $M_n$ 1130<br>Da)                           | (7.24 ) | 25 | 400 ppm | 1 atm | 0.86 | 0.12 | Poly(allylamine)Mesoporous<br>Silica Composite Materials for<br>CO <sub>2</sub><br>Capture from Simulated Flue<br>Gas or Ambient Air Watcharop<br>Chaikittisilp 2011 |



## PALS

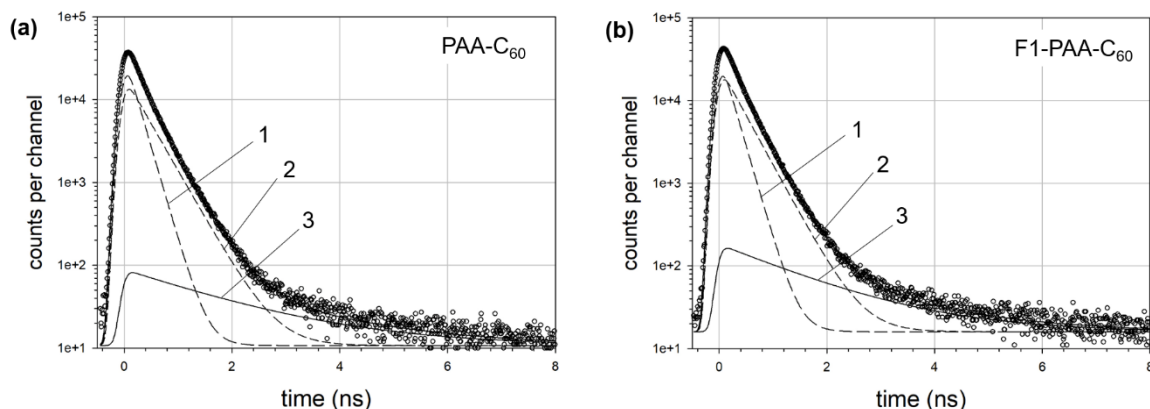

**Figure S10.** Positron lifetime spectra of (a) PAA-C<sub>60</sub> and (b) F1-PAA-C<sub>60</sub> with fitting lines corresponding to components 1) indium reference, 2) localised molecular defects, and 3) free volume present in the materials. Fitting lines of source contributions have not been included for ease of representation.

**Table S3.** The values of the three lifetime components and their respective intensities for PAA-C<sub>60</sub> and F1-PAA-C<sub>60</sub>. The shortest lifetime was fixed at 194 ps at a lifetime for Indium,<sup>5</sup> which was used a reference material in our experimental geometry. The source correction was assumed at 15%, with contributions from 372 ps at 98% in NaCl salt and at 2000 ps (2 ns) with 2 % from epoxy sealing of the source.

| Sample                 | $\tau_1$ [ps] | $I_1$ [%]   | $\tau_2$ [ps] | $I_2$ [%]   | $\tau_3$ [ps] | $I_3$ [%]  |
|------------------------|---------------|-------------|---------------|-------------|---------------|------------|
| PAA-C <sub>60</sub>    | 194 fixed     | 49.57(0.61) | 389.9(2.0)    | 47.9(0.26)  | 1710(36)      | 5.02(0.30) |
| F1-PAA-C <sub>60</sub> | 194 fixed     | 50.1(0.5)   | 386.3(2.8)    | 49.04(0.49) | 2100(170)     | 1.76(1.2)  |

In a PALS experiment, a positron is injected into the material to thermalize within a few picoseconds. The positron diffuses into the material where it either self-annihilates or forms a metastable bound state with an electron called positronium (Ps) with a dimension of about 1.06 Å.<sup>6</sup> There are two states of Ps derived from different combinations of positron and electron: the para-Ps (p-Ps) with anti-parallel spin ( $\uparrow\downarrow$ ) with the probability 1/4, and the ortho-Ps (o-Ps) with parallel spin combination ( $\uparrow\uparrow$ ), with the probability 3/4.<sup>7</sup> Due to the spin rules, the intrinsic p-Ps lifetime is over a thousand times shorter than the o-Ps lifetime. The intrinsic lifetime of p-Ps is 125 ps. o-Ps annihilates intrinsically with a lifetime of 142 ns, in a vacuum in the absence of electrons. If a positron is injected in a physical material, it interacts with electrons and the environment, behaving as a quantum particle with characteristic de-Broglie wavelength. In areas of free volume with low electron density, a positron is preferentially

trapped creating an o-Ps that subsequently annihilates with an electron of opposite spin present in the surrounding material. This phenomenon is called “pick-off annihilation” and while it reduces the annihilation lifetime of o-Ps,<sup>8</sup> it gives information about the size of free volume and its frequency via its pick-off lifetime and intensity. It is thus anticipated that o-Ps lifetime reveals information on the size of the free volume elements where it is confined. The larger the free volume holes, the longer are the positron lifetimes, and vice versa. Due to its substantially smaller size in comparison with physical molecules, like nitrogen (3.64 Å), typically employed in physisorption studies, Ps are used to probe “closed pores” that molecular and atomic size gas molecules cannot access. In the present study, N<sub>2</sub> porosimetry was inadequate to provide information on the free volume present in the materials. Plain and alkylfluorinated cross-linked PAA sorbents contain really small “nano-spaces”, which could not be assessed by N<sub>2</sub> molecules. As a result, we did not observe measurable N<sub>2</sub> adsorption in these materials.

## References

1. S. S. York, S. E. Boesch, R. A. Wheeler and R. Frech, *Macromolecules*, 2003, 36, 7348-7351.
2. S. Lakard, G. Herlem, B. Lakard and B. Fahys, *Journal of Molecular Structure: THEOCHEM*, 2004, 685, 83-87.
3. G. Socrates, *Infrared and Raman Characteristic Group Frequencies: Tables and Charts*, Wiley, 2004.
4. J. M. El Khoury, D. Caruntu, C. J. O’ Connor, K.-U. Jeong, S. Z. D. Cheng and J. Hu, *J. Nanopart. Res.*, 2007, 9, 959-964.
5. J. del Río, F. Plazaola, N. de Diego and P. Moser, *Solid State Commun.*, 1994, 89, 913-915.
6. P. Hautojärvi and A. Vehanen, in *Positrons in Solids*, ed. P. Hautojärvi, Springer Berlin Heidelberg, Berlin, Heidelberg, 1979, DOI: 10.1007/978-3-642-81316-0\_1, pp. 1-23.
7. Y. C. Jean, P. E. Mallon and D. M. Schrader, *Principles and Applications of Positron and Positronium Chemistry*, 2003.
8. D. M. Schrader and Y. C. Jean, *Positron and positronium chemistry*, Elsevier, Amsterdam [The Netherlands]; New York, 1988.
